# Supplementary material
Source: publisher site journal article supplement (https://www.dovepress.com/get_supplementary_file.php?f=215037.docx)
Supplement: Supplementary file 1 [file get_supplementary_file.php]

**Supplemental Table. ICD-9/10 codes used to identify patients with autoimmune disorders.**

| **Disease** | **ICD-9/10 Code** |
| --- | --- |
| Rheumatoid arthritis | 714, 714.0, 714.8, 714.89, 714.9, M05.x, M06.x, M08.x |
| Crohn’s disease | 555.x, K50.x |
| Ulcerative colitis | 556.x, K51.x |
| Psoriasis | 696, 696.1, 696.8, L40.x |
| Psoriatic arthritis | 696.0, L40.5 |
| Ankylosing spondylitis | 720, 720.0, M45.x, M08.1 |
| Hidradenitis suppurativa | 705.83, L73.2 |
| Uveitis | 360.01, 360.02, 360.03, 360.11, 360.12, 362.12, 362.18, 363.00, 363.01, 363.03, 363.04, 363.05, 363.06, 363.10, 363.11, 363.12, 363.13, 363.14, 363.15, 363.20, 363.21, 363.22, 364.0, 364.00, 364.01, 364.02, 364.03, 364.04, 364.05, 364.1, 364.10, 364.11, 364.21, 364.22, 364.23, 364.24, 364.3, H20.0 |
